# Supplementary material for: Anxiety and Depression in Metabolic-Dysfunction-Associated Fatty Liver Disease and Cardiovascular Risk
Source: MDPI journal article supplement (doi:10.3390/jcm11092488), 2022-04-28
Supplement: s1 [file s1]

**Supplementary Table S1.** Evaluated cardiovascular ultrasound parameters

| <b>Characteristic</b>                                            | <b>Total (n= 77)</b> | <b>Control (n= 38)</b> | <b>MAFLD (n= 39)</b>  | <b>P-value</b> |
|------------------------------------------------------------------|----------------------|------------------------|-----------------------|----------------|
| <i>CIMT - mean (mm), median (IQR)</i>                            | 8.5 (7 - 10)         | 7 (6.5 - 8.38)         | 10 (8.5 - 11)         | < 0.001        |
| <i>Left atrial diameter (mm), mean (SD)</i>                      | 31.08 (4.64)         | 28.63 (4.1)            | 33.46 (3.84)          | < 0.001        |
| <i>Left ventricular diameter (mm), median (IQR)</i>              | 44 (40 - 47)         | 42 (38.25 - 44)        | 45 (43 - 49)          | < 0.001        |
| <i>Right ventricular diameter (mm), median (IQR)</i>             | 23 (21 - 26)         | 22 (20.25 - 24)        | 25 (22 - 27)          | 0.003          |
| <i>Interatrial septal wall thickness (mm), median (IQR)</i>      | 6 (5 - 7)            | 5 (5 - 7)              | 6 (6 - 7)             | 0.013          |
| <i>Interventricular septal wall thickness (mm), median (IQR)</i> | 9 (8 - 10)           | 8 (8 - 9)              | 10 (9.5 - 11.5)       | < 0.001        |
| <i>LVPWT (mm), median (IQR)</i>                                  | 10 (8 - 10)          | 8 (8 - 9)              | 10 (10 - 11)          | < 0.001        |
| <i>Early diastolic peak velocity - E (m/s), median (IQR)</i>     | 0.73 (0.62 - 0.85)   | 0.8 (0.71 - 0.95)      | 0.65 (0.58 - 0.78)    | < 0.001        |
| <i>Late diastolic peak velocity - A (m/s), median (IQR)</i>      | 0.51 (0.43 - 0.73)   | 0.48 (0.42 - 0.56)     | 0.7 (0.49 - 0.8)      | < 0.001        |
| <i>E/A ratio, median (IQR)</i>                                   | 1.4 (1 - 1.8)        | 1.72 (1.33 - 1.98)     | 1.07 (0.73 - 1.42)    | < 0.001        |
| <i>Early diastolic velocity - e' (m/s), median (IQR)</i>         | 0.13 (0.11 - 0.17)   | 0.17 (0.14 - 0.2)      | 0.11 (0.08 - 0.13)    | < 0.001        |
| <i>Late diastolic velocity - a' (m/s), median (IQR)</i>          | 0.09 (0.07 - 0.14)   | 0.09 (0.07 - 0.13)     | 0.1 (0.08 - 0.16)     | 0.136          |
| <i>e'/a' ratio, median (IQR)</i>                                 | 1.46 (0.88 - 2.14)   | 1.68 (1.44 - 2.4)      | 0.93 (0.69 - 1.61)    | < 0.001        |
| <i>E/e' ratio, median (IQR)</i>                                  | 5.37 (4.47 - 6.67)   | 5.05 (4.1 - 5.58)      | 5.92 (4.95 - 7.37)    | 0.004          |
| <i>LVEDV (ml), median (IQR)</i>                                  | 95 (77 - 115)        | 84 (73.25 - 102)       | 103 (94 - 122.5)      | < 0.001        |
| <i>LVESV (ml), median (IQR)</i>                                  | 45 (37 - 56)         | 39 (32.75 - 47)        | 54 (44 - 63.5)        | < 0.001        |
| <i>Ejection fraction (EF) (%), median (IQR)</i>                  | 50 (46 - 56)         | 52.5 (48 - 57)         | 48 (45.5 - 52)        | 0.004          |
| <i>Stroke volume (ml), median (IQR)</i>                          | 51 (39 - 57)         | 44 (36.25 - 56.5)      | 53 (46.5 - 57.5)      | 0.03           |
| <i>Cardiac output, median (IQR)</i>                              | 3.53 (2.88 - 4.33)   | 3.12 (2.61 - 3.96)     | 3.82 (3.09 - 5.13)    | 0.019          |
| <i>GLS – Long axis view (%), median (IQR)</i>                    | 20.2 (18.1 - 22.3)   | 21.5 (19.28 - 22.95)   | 18.9 (17.4 - 20.65)   | < 0.001        |
| <i>GLS – 4-chamber view (%), median (IQR)</i>                    | 18.7 (17.2 - 20.6)   | 20.45 (18.35 - 21.87)  | 17.7 (15.95 - 19.1)   | < 0.001        |
| <i>GLS – 2-chamber view (%), median (IQR)</i>                    | 18.2 (15.8 - 20.7)   | 20.3 (19.12 - 21.9)    | 16.1 (14.95 - 17.9)   | < 0.001        |
| <i>GLS – Average (%), median (IQR)</i>                           | 19 (17.4 - 20.97)    | 20.92 (19.64 - 22.58)  | 17.67 (16.42 - 18.82) | < 0.001        |

GLS – Global longitudinal strain; IQR – Interquartile range; LVEDV – Left ventricular end diastolic volume; LVESV – Left ventricular end systolic volume; LVPWT – Left ventricular posterior wall thickness; MAFLD – Metabolic-associated fatty liver disease.
